# Supplementary material
Source: publisher figshare collection journal article supplement (https://acs.figshare.com/ndownloader/files/4015843)
Supplement: Supplementary file 1 [file 4015843]

# **Comprehensive Signal Assignment of $^{13}\text{C}$ -Labeled Lignocellulose using Multidimensional Solution NMR and $^{13}\text{C}$ Chemical Shift Comparison with Solid-State NMR**

Takanori Komatsu<sup>†, ‡</sup>, Jun Kikuchi<sup>†, ‡, §, #\*</sup>

<sup>†</sup>RIKEN Center for Sustainable Resource Science, 1-7-22 Suehiro-cho, Tsurumi-ku, Yokohama 235-0045, Japan

<sup>\*</sup>Graduate School of Medical Life Science, Yokohama City University, 1-7-29 Suehirocho, Tsurumi-ku, Yokohama 230-0045, Japan

<sup>§</sup>Biomass Engineering Research Program, RIKEN Research Cluster for Innovation, 2-1 Hirosawa, Wako 351-0198, Japan

<sup>#</sup>Graduate School of Bioagricultural Sciences and School of Agricultural Sciences, Nagoya University, 1 Furo-cho, Chikusa-ku, Nagoya 464-8601, Japan

**Table S1. Assignment references and notes**

|                       | residues                                   | references [reference no.]                                                                                                                                                                                                                                                                                                                                                                                                                                                                                                                                              | assignment note                                                                                            |
|-----------------------|--------------------------------------------|-------------------------------------------------------------------------------------------------------------------------------------------------------------------------------------------------------------------------------------------------------------------------------------------------------------------------------------------------------------------------------------------------------------------------------------------------------------------------------------------------------------------------------------------------------------------------|------------------------------------------------------------------------------------------------------------|
| cello-oligosaccharide | 1,4) $\beta$ -D-Glcp                       | (Kim and Ralph. 2010) 103.1/ 4.39 ppm ( $\delta_{13C1} / \delta_{1H1}$ ) [1]                                                                                                                                                                                                                                                                                                                                                                                                                                                                                            | C/H1-6 were identified in HCCCH-COSY                                                                       |
|                       | 1,4) $\beta$ -D-Glcp (non reducing end)    | cellotetraose, cellobiose, cellobiose                                                                                                                                                                                                                                                                                                                                                                                                                                                                                                                                   | C/H1-6 were identified in $^{13}C$ -HSQC-TOCSY.                                                            |
|                       | 1,4) $\beta$ -D-Glcp (reducing end)        | (Kim and Ralph. 2010) 97.1/ 4.44 ppm ( $\delta_{13C1} / \delta_{1H1}$ ) [1]                                                                                                                                                                                                                                                                                                                                                                                                                                                                                             | C/H1-5 were identified in $^{13}C$ -HSQC-TOCSY.                                                            |
|                       | 1,4) $\alpha$ -D-Glcp (reducing end)       | (Kim and Ralph. 2010) 92.2/ 5.10 ppm ( $\delta_{13C1} / \delta_{1H1}$ ) [1]                                                                                                                                                                                                                                                                                                                                                                                                                                                                                             | C/H1-5 were identified in $^{13}C$ -HSQC-TOCSY.                                                            |
| xylans                | 1,4) $\beta$ -D-Xylp                       | (Kim and Ralph. 2010) 101.8/ 4.32 ppm ( $\delta_{13C1} / \delta_{1H1}$ ) [1]                                                                                                                                                                                                                                                                                                                                                                                                                                                                                            | C/H1-5 were identified in HCCCH-COSY                                                                       |
|                       | 1,4) $\beta$ -D-Xylp (non reducing end)    | Xylooligosaccharide                                                                                                                                                                                                                                                                                                                                                                                                                                                                                                                                                     | C/H1-5 were identified in $^{13}C$ -HSQC-TOCSY.                                                            |
|                       | 1,4) $\beta$ -D-Xylp (reducing end)        | (Kim and Ralph. 2010) 97.5/ 4.38 ppm ( $\delta_{13C1} / \delta_{1H1}$ ) [1]                                                                                                                                                                                                                                                                                                                                                                                                                                                                                             | C/H1-5 were identified in $^{13}C$ -HSQC-TOCSY.                                                            |
|                       | 1,4) $\alpha$ -D-Xylp (reducing end)       | (Kim and Ralph. 2010) 92.4/ 5.10 ppm ( $\delta_{13C1} / \delta_{1H1}$ ) [1]                                                                                                                                                                                                                                                                                                                                                                                                                                                                                             | C/H1-5 were identified in $^{13}C$ -HSQC-TOCSY.                                                            |
|                       | 3-O-Xylp-substituted 1,4) $\beta$ -D-Xylp  | (Hojje <i>et al.</i> 2006) 102.9/4.527 ( $\delta_{13C1} / \delta_{1H1}$ ), 74.4/3.484 ( $\delta_{13C2} / \delta_{1H2}$ ), 78.9/3.752 ( $\delta_{13C3} / \delta_{1H3}$ ), 75.0/3.803 ( $\delta_{13C4} / \delta_{1H4}$ ), 64.4/4.161 ppm ( $\delta_{13C5} / \delta_{1H5}$ )* (Hojje <i>et al.</i> 2006) 108.8/5.406 ( $\delta_{13C1} / \delta_{1H1}$ ), 82.3/4.173 ( $\delta_{13C2} / \delta_{1H2}$ ), 78.6/3.929 ( $\delta_{13C3} / \delta_{1H3}$ ), 85.8/4.184 ( $\delta_{13C4} / \delta_{1H4}$ ), 62.6/3.802, 3.730 ppm ( $\delta_{13C5} / \delta_{1H5}$ )* [2]        | C/H1-5 were identified in $^{13}C$ -HSQC-TOCSY and $^{13}C$ -HSQC-NOESY.                                   |
|                       | 1,3) $\alpha$ -L-Araf                      | (Hojje <i>et al.</i> 2006) 107.5/5.539 ( $\delta_{13C1} / \delta_{1H1}$ ), 90.02/4.287 ( $\delta_{13C2} / \delta_{1H2}$ ), 77.2/4.092 ( $\delta_{13C3} / \delta_{1H3}$ ), 85.6/4.26 ( $\delta_{13C4} / \delta_{1H4}$ ), 62.6/3.815, 3.736 ppm ( $\delta_{13C5} / \delta_{1H5}$ )* [2]                                                                                                                                                                                                                                                                                   | C/H1-5 were identified in HCCCH-COSY                                                                       |
|                       | 2-O-Xylp-substituted 1,3) $\alpha$ -L-Araf | (Hojje <i>et al.</i> 2006) 107.5/5.539 ( $\delta_{13C1} / \delta_{1H1}$ ), 90.02/4.287 ( $\delta_{13C2} / \delta_{1H2}$ ), 77.2/4.092 ( $\delta_{13C3} / \delta_{1H3}$ ), 85.6/4.26 ( $\delta_{13C4} / \delta_{1H4}$ ), 62.6/3.815, 3.736 ppm ( $\delta_{13C5} / \delta_{1H5}$ )* [2]                                                                                                                                                                                                                                                                                   | C/H1-5 were identified in $^{13}C$ -HSQC-TOCSY.                                                            |
|                       | 1,2) $\alpha$ -L-Araf                      | (Pitkanen <i>et al.</i> 2008) 5.30 ppm ( $\delta_{1H1}$ )* [3]                                                                                                                                                                                                                                                                                                                                                                                                                                                                                                          | C/H1-5 were identified in $^{13}C$ -HSQC-TOCSY.                                                            |
| xyloglucans           | 1,6) $\alpha$ -L-Xylp                      | (Jia <i>et al.</i> 2003) 101.6/4.959 ( $\delta_{13C1} / \delta_{1H1}$ ), 74.2/3.543 ( $\delta_{13C2} / \delta_{1H2}$ ), 75.7/3.722 ( $\delta_{13C3} / \delta_{1H3}$ ), 72.2/3.618 ( $\delta_{13C4} / \delta_{1H4}$ ), 64.3/3.571, 3.733 ppm ( $\delta_{13C5} / \delta_{1H5}$ )* [4] (Jia <i>et al.</i> 2003) 111.9/5.169 ( $\delta_{13C1} / \delta_{1H1}$ ), 83.9/4.199 ( $\delta_{13C2} / \delta_{1H2}$ ), 79.1/3.934 ( $\delta_{13C3} / \delta_{1H3}$ ), 86.4/4.084 ( $\delta_{13C4} / \delta_{1H4}$ ), 63.8/3.848, 3.712 ppm ( $\delta_{13C5} / \delta_{1H5}$ )* [4] | C/H1-5 were identified in $^{13}C$ -HSQC-TOCSY.                                                            |
|                       | 1,3) $\alpha$ -L-Araf                      | (Jia <i>et al.</i> 2003) 111.9/5.169 ( $\delta_{13C1} / \delta_{1H1}$ ), 83.9/4.199 ( $\delta_{13C2} / \delta_{1H2}$ ), 79.1/3.934 ( $\delta_{13C3} / \delta_{1H3}$ ), 86.4/4.084 ( $\delta_{13C4} / \delta_{1H4}$ ), 63.8/3.848, 3.712 ppm ( $\delta_{13C5} / \delta_{1H5}$ )* [4]                                                                                                                                                                                                                                                                                     | C/H1-5 were identified in $^{13}C$ -HSQC-TOCSY.                                                            |
| starch                | 1,4) $\alpha$ -D-Glcp                      | (Kim and Ralph. 2010) 101.8/ 4.32 ppm ( $\delta_{13C1} / \delta_{1H1}$ ) [1]                                                                                                                                                                                                                                                                                                                                                                                                                                                                                            | C/H1-6 were identified in $^{13}C$ -HSQC-TOCSY.                                                            |
|                       | 1,4) $\alpha$ -D-Glcp'                     | (Kim and Ralph. 2010) 101.8/ 4.32 ppm ( $\delta_{13C1} / \delta_{1H1}$ ) [1]                                                                                                                                                                                                                                                                                                                                                                                                                                                                                            | C/H1-6 were identified in $^{13}C$ -HSQC-TOCSY.                                                            |
| lignin                | $\beta$ -O-4(S) <i>erythro</i>             | (Kim and Ralph. 2010) 71.3/4.87 ( $\delta_{13C\alpha} / \delta_{1H\alpha}$ ), *** 86.2/4.22 ( $\delta_{13C\beta} / \delta_{1H\beta}$ ), 60.1/3.73, 3.40 ppm ( $\delta_{13C\gamma} / \delta_{1H\gamma}$ ) [1]                                                                                                                                                                                                                                                                                                                                                            | C/H $\alpha$ - $\gamma$ were identified in HCCCH-COSY. C/H2 and 6 were identified in $^{13}C$ -HSQC-NOESY. |
|                       | $\beta$ -O-4(S) <i>threo</i>               | (Kim and Ralph. 2010) 71.3/4.87 ( $\delta_{13C\alpha} / \delta_{1H\alpha}$ ), *** 87.2/4.09 ( $\delta_{13C\beta} / \delta_{1H\beta}$ ), 60.1/3.73, 3.40 ppm ( $\delta_{13C\gamma} / \delta_{1H\gamma}$ ) [1]                                                                                                                                                                                                                                                                                                                                                            | C/H $\alpha$ - $\gamma$ were identified in HCCCH-COSY.                                                     |
|                       | $\beta$ -O-4(G) <i>erythro</i>             | (Kim and Ralph. 2010) 71.3/4.87 ( $\delta_{13C\alpha} / \delta_{1H\alpha}$ ), *** 83.9/4.45 ( $\delta_{13C\beta} / \delta_{1H\beta}$ ), 60.1/3.73, 3.40 ppm ( $\delta_{13C\gamma} / \delta_{1H\gamma}$ ) [1]                                                                                                                                                                                                                                                                                                                                                            | C/H $\alpha$ - $\gamma$ were identified in HCCCH-COSY.                                                     |
|                       | $\beta$ -O-4(G) <i>threo</i>               | (Kim and Ralph. 2010) 71.3/4.87 ( $\delta_{13C\alpha} / \delta_{1H\alpha}$ ), *** 84.4/4.39 ( $\delta_{13C\beta} / \delta_{1H\beta}$ ), 60.1/3.73, 3.40 ppm ( $\delta_{13C\gamma} / \delta_{1H\gamma}$ ) [1]                                                                                                                                                                                                                                                                                                                                                            | C/H $\alpha$ - $\gamma$ were identified in HCCCH-COSY.                                                     |
|                       | $\beta$ -5                                 | (Kim and Ralph. 2010) 87.1/5.55 ( $\delta_{13C\alpha} / \delta_{1H\alpha}$ ), 54.3/3.57 ( $\delta_{13C\beta} / \delta_{1H\beta}$ ), 62.8/3.80 ppm ( $\delta_{13C\gamma} / \delta_{1H\gamma}$ ) [1] (Kim and Ralph. 2010) 85.0/4.67 ( $\delta_{13C\alpha} / \delta_{1H\alpha}$ ),                                                                                                                                                                                                                                                                                        | C/H $\alpha$ - $\gamma$ were identified in $^{13}C$ -HSQC-TOCSY.                                           |
|                       | $\beta$ - $\beta$                          | 53.7/3.06 ( $\delta_{13C\beta} / \delta_{1H\beta}$ ), 71.0/3.77, 4.14 ppm ( $\delta_{13C\gamma} / \delta_{1H\gamma}$ ) [1]                                                                                                                                                                                                                                                                                                                                                                                                                                              | C/H $\alpha$ - $\gamma$ were identified in $^{13}C$ -HSQC-TOCSY.                                           |
|                       | cinnamyl alcohol                           | (Kim and Ralph. 2010) 128.5/6.49 ( $\delta_{13C\alpha} / \delta_{1H\alpha}$ ), 128.7/6.38 ( $\delta_{13C\beta} / \delta_{1H\beta}$ ), 61.7/4.15 ppm ( $\delta_{13C\gamma} / \delta_{1H\gamma}$ ) [1]                                                                                                                                                                                                                                                                                                                                                                    | C/H $\alpha$ - $\gamma$ were identified in $^{13}C$ -HSQC-TOCSY.                                           |

\* These values were determined using isolated arabinoxylan from barley (*Hordeum vulgare*) in D<sub>2</sub>O.

\*\* These values were determined using oligoglycosyl alditols in D<sub>2</sub>O. These values are slightly different from their structure.

\*\*\* These values do not be distinguished with *erythro* and *threo*.

**Table S2. Correspondence of Samples to Hemicelluloses**

|                                            | order      | family            | major hemicellulose in primary wall             | major hemicellulose in secondary wall |
|--------------------------------------------|------------|-------------------|-------------------------------------------------|---------------------------------------|
| potatoes<br>( <i>Solanum tuberosum</i> L.) | Solanaceae | <i>Solanum</i>    | arabinoxyloglucan                               | glucronoxylan                         |
| chicory<br>( <i>Cichorium intybus</i> )    | Asterales  | <i>Asteraceae</i> | xyloglucan                                      | glucronoxylan                         |
| corn<br>( <i>Zea mays</i> )                | Poales     | <i>Poaceae</i>    | $\beta$ -1,3-1,4-glucan* & glucronoarabinoxylan | glucronoarabinoxylan                  |

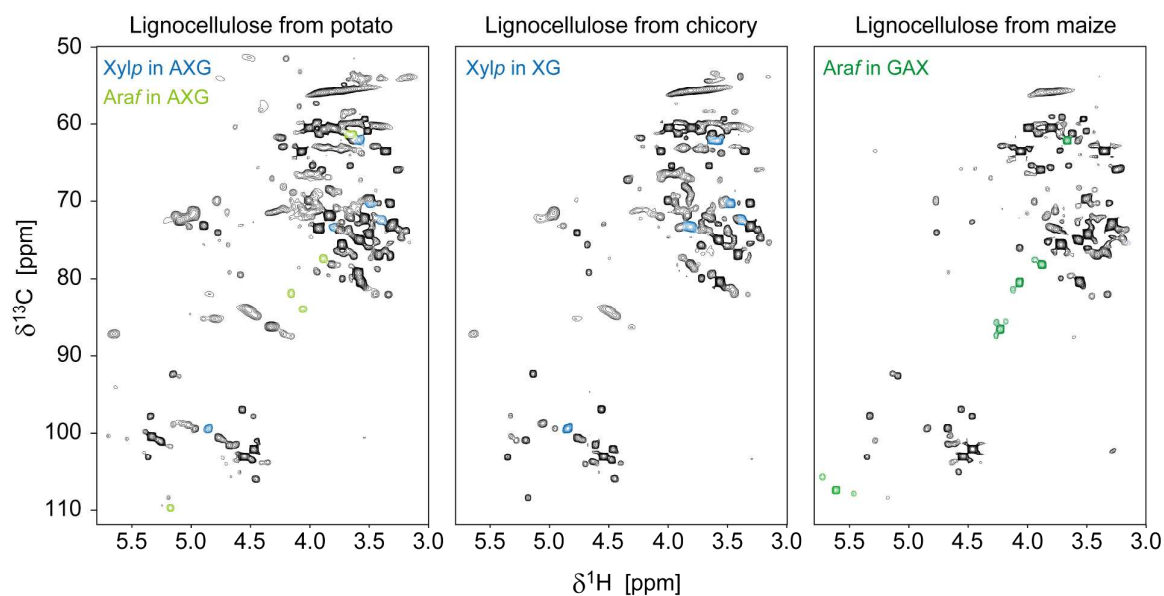

Figure S1. Characteristic hemicellulosic signals on  $^{13}\text{C}$ -HSQC spectra

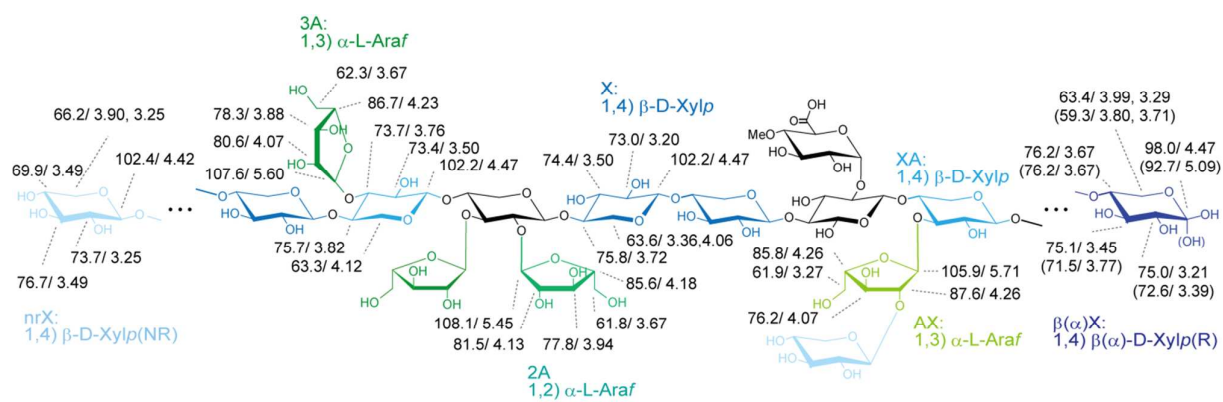

Figure S2. Partial structures of glucuronoarabinoxylan and their chemical shifts.

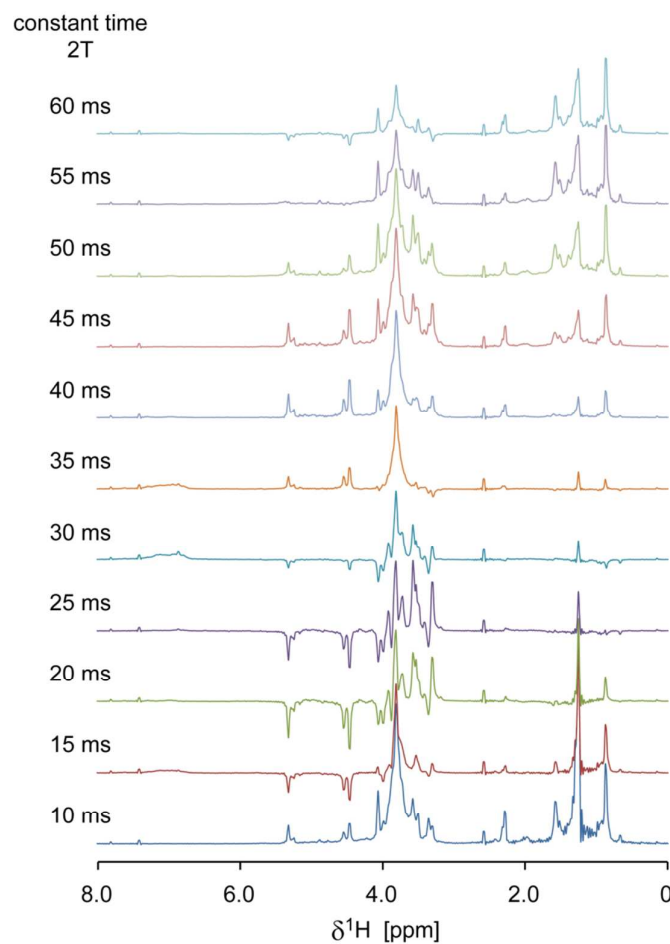

Figure S3. Constant time (2T) series of  $^1\text{H}$  projections for the ct-HSQC spectra. Signal intensities changed as a function of  $I\cos(2T\pi J_{CC})$ .

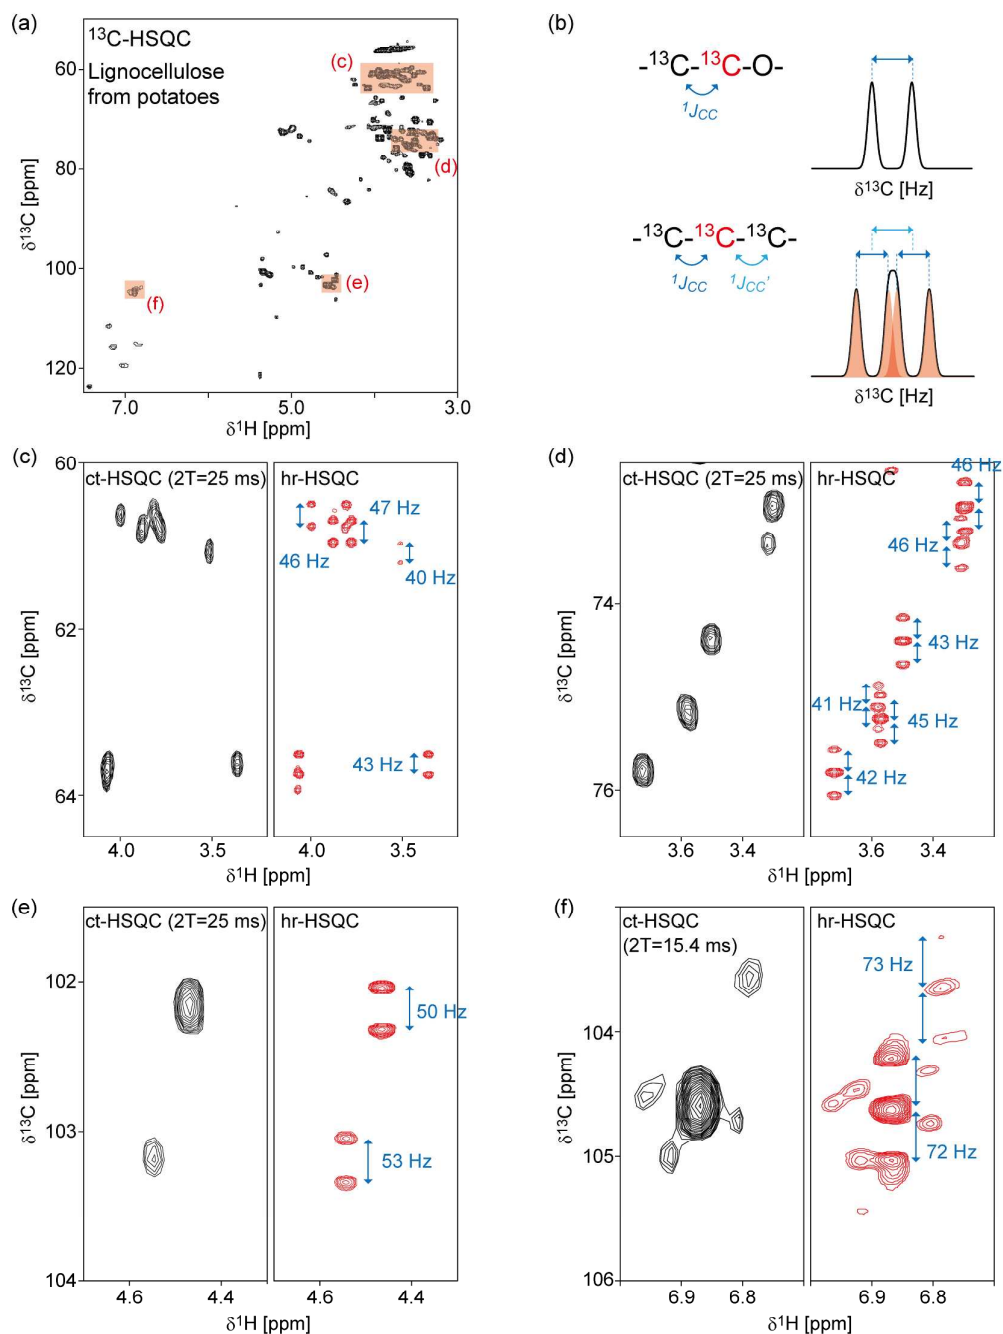

Figure S4. The evaluation of  $^1J_{CC}$  values using high-resolution  $^{13}\text{C}$ -HSQC to optimize values of 2T in ct-HSQC. (a)  $^{13}\text{C}$ -HSQC spectrum of  $^{13}\text{C}$ -labeled lignocellulose from potatoes. (b)  $^{13}\text{C}$ - $^{13}\text{C}$  splitting pattern of uniformly  $^{13}\text{C}$ -labeled compounds. The evaluation of  $^1J_{CC}$  values in aliphatic (c), (d), anomeric (e), and aromatic region (f). Left and right spectra are ct-HSQC and high-resolution  $^{13}\text{C}$ -HSQC spectra respectively. In high-resolution  $^{13}\text{C}$ -HSQC experiments, 2048 complex f1 ( $^{13}\text{C}$ ) points were recorded and the spectral widths of the f2 dimensions were 60 ppm.

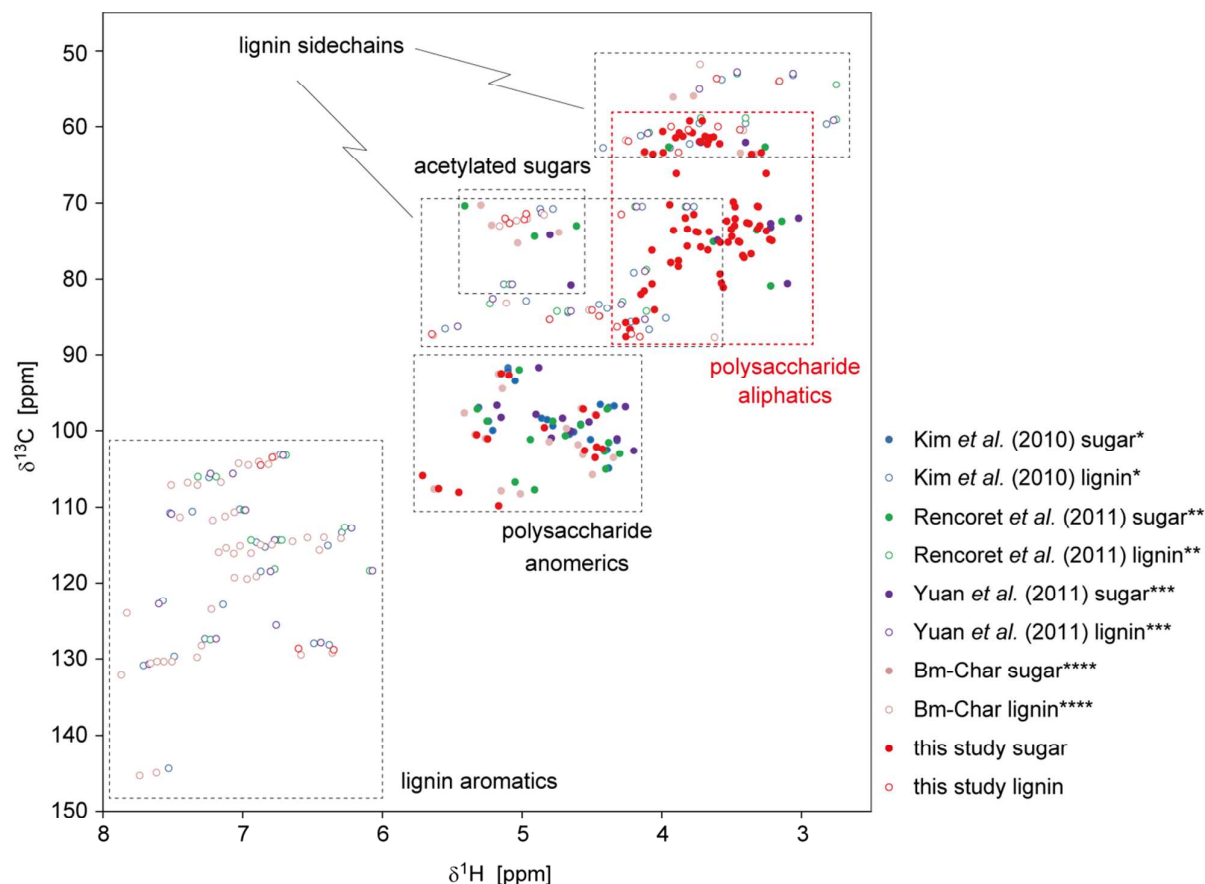

Figure S5. Comparison of signal assignments between this study and previous reports. Previous reports focused on lignin and the well-resolved anomeric signals of the polysaccharide. The use of  $^{13}\text{C}$  labeled samples in the current study combined with multidimensional NMR delivered significant advances for signal assignments, especially for the aliphatic region of polysaccharides. Note that the plots assigned in this study include only fully assigned components, whereas those from other studies included only partly assigned signals. \*Reference number1 \*\* Reference number5 \*\*\* Reference number6 \*\*\*\* This data was obtained from Bm-Char which is a web tool used to characterize the chemical structure of lignocellulosic biomass using NMR data.<sup>7,8</sup> (<https://database.riken.jp/economics/index.html>)

## References

- (1) Kim, H.; Ralph, J. *Org Biomol Chem* **2010**, *8*, 576.
- (2) Hoije, A.; Sandstrom, C.; Roubroeks, J. P.; Andersson, R.; Gohil, S.; Gatenholm, P. *Carbohydr Res* **2006**, *341*, 2959.
- (3) Pitkanen, L.; Tuomainen, P.; Virkki, L.; Aseyev, V.; Tenkanen, M. *J Agr Food Chem* **2008**, *56*, 5069.
- (4) Jia, Z. H.; Qin, Q.; Darvill, A. G.; York, W. S. *Carbohydr Res* **2003**, *338*, 1197.
- (5) Rencoret, J.; Gutierrez, A.; Nieto, L.; Jimenez-Barbero, J.; Faulds, C. B.; Kim, H.; Ralph, J.; Martinez, A. T.; del Rio, J. C. *Plant Physiol* **2011**, *155*, 667.
- (6) Yuan, T. Q.; Sun, S. N.; Xu, F.; Sun, R. C. *J Agr Food Chem* **2011**, *59*, 10604.
- (7) Kikuchi, J.; Ogata, Y.; Shinozaki, K. *J. Ecosys. Ecogr* **2011**, *S2*, 001.
- (8) Ogata, Y.; Chikayama, E.; Morioka, Y.; Everroad, R. C.; Shino, A.; Matsushima, A.; Haruna, H.; Moriya, S.; Toyoda, T.; Kikuchi, J. *Plos One* **2012**, *7*.
